# Supplementary material for: Transcriptomics and Physiological Analyses Reveal Changes in Paclitaxel Production and Physiological Properties in Taxus cuspidata Suspension Cells in Response to Elicitors
Source: MDPI journal article supplement (doi:10.3390/plants12223817), 2023-11-10
Supplement: s1 [file s1]

## **Supplementary File**

# Supplementary Table S1

**Table S1.** B5 solid medium composition.

| Nutrient component                                  | Concentration (mg/L) |
|-----------------------------------------------------|----------------------|
| Sucrose                                             | 20000                |
| Agar                                                | 7000                 |
| KNO <sub>3</sub>                                    | 3000                 |
| Hydrolyzed milk protein                             | 500                  |
| MgSO <sub>4</sub> ·7H <sub>2</sub> O                | 500                  |
| Inositol                                            | 200                  |
| NaH <sub>2</sub> PO <sub>4</sub> ·H <sub>2</sub> O  | 150                  |
| CaCl <sub>2</sub> ·2H <sub>2</sub> O                | 150                  |
| (NH <sub>4</sub> ) <sub>2</sub> SO <sub>4</sub>     | 134                  |
| Na <sub>2</sub> EDTA                                | 37.3                 |
| FeSO <sub>4</sub> ·7H <sub>2</sub> O                | 27.8                 |
| Vitamin B <sub>1</sub>                              | 20                   |
| MnSO <sub>4</sub> ·H <sub>2</sub> O                 | 10                   |
| H <sub>3</sub> PO <sub>3</sub>                      | 3                    |
| Vitamin B <sub>6</sub>                              | 3                    |
| ZnSO <sub>4</sub> ·7H <sub>2</sub> O                | 2                    |
| Niacin                                              | 2                    |
| Glycine                                             | 2                    |
| α-Naphthalene Acetic Acid                           | 2                    |
| KI                                                  | 0.75                 |
| Na <sub>2</sub> MoO <sub>4</sub> ·2H <sub>2</sub> O | 0.25                 |
| CuSO <sub>4</sub> ·5H <sub>2</sub> O                | 0.025                |
| CoCl <sub>2</sub> ·6H <sub>2</sub> O                | 0.025                |

# Supplementary Table S2

**Table S2.** Dry weight (DW), fresh weight (FW), relative electrolytic leakage and paclitaxel production under PEG, CD, or SA treatment in *Taxus cuspidata* suspension cells.

| Treatment     | DW (g/L)   | FW (g/L)    | Relative electrolytic leakage (%) | Paclitaxel (mg/L) |
|---------------|------------|-------------|-----------------------------------|-------------------|
| 1.5% PEG      | 13.20±0.31 | 142.19±0.42 | 29.65±1.43                        | 1.62±0.11         |
| 3% PEG        | 13.81±0.30 | 150.00±0.59 | 31.63±1.95                        | 2.55±0.15         |
| 4.5% PEG      | 13.49±0.58 | 140.38±0.60 | 49.01±1.76                        | 1.85±0.14         |
| 6% PEG        | 8.09±0.88  | 119.95±0.63 | 62.52±1.47                        | 1.63±0.12         |
| 25 mmol/L CD  | 11.99±1.24 | 147.41±7.56 | 25.66±1.13                        | 1.73±0.14         |
| 50 mmol/L CD  | 14.98±1.21 | 171.55±8.25 | 24.29±1.65                        | 2.40±0.15         |
| 75 mmol/L CD  | 14.07±0.60 | 157.03±8.18 | 27.28±2.57                        | 2.30±0.12         |
| 100 mmol/L CD | 9.62±0.89  | 142.40±6.57 | 33.69±2.21                        | 1.95±0.12         |
| 5 mg/L SA     | 11.69±0.31 | 129.38±7.19 | 32.52±4.58                        | 2.10±0.10         |
| 10 mg/L SA    | 11.41±0.28 | 119.01±8.20 | 43.58±2.74                        | 2.69±0.10         |
| 15 mg/L SA    | 11.11±0.31 | 115.22±8.38 | 61.04±5.98                        | 3.20±0.12         |
| 20 mg/L SA    | 10.80±0.29 | 100.78±5.60 | 72.34±3.49                        | 3.56±0.15         |

### Supplementary Table S3

**Table S3.** Response surface test design and results.

|    | A-PEG (%) | B-CD (mmol/L) | C-SA (mg/L) | Paclitaxel (mg/L) |
|----|-----------|---------------|-------------|-------------------|
| 1  | -1 (2)    | 1 (65)        | 0 (20)      | 2.87              |
| 2  | 0 (3)     | 0 (50)        | 0           | 6.92              |
| 3  | 0         | -1 (35)       | 1 (30)      | 4.18              |
| 4  | 0         | 1             | -1 (10)     | 5.14              |
| 5  | 0         | 0             | 0           | 7.52              |
| 6  | 1 (4)     | 0             | -1          | 7.81              |
| 7  | -1        | -1            | 0           | 4.83              |
| 8  | 0         | 0             | 0           | 8.11              |
| 9  | 1         | 0             | 1           | 3.99              |
| 10 | 0         | 0             | 0           | 7.67              |
| 11 | -1        | 0             | -1          | 4.04              |
| 12 | 0         | -1            | -1          | 6.21              |
| 13 | 1         | 1             | 0           | 5.02              |
| 14 | 0         | 0             | 0           | 6.94              |
| 15 | 1         | -1            | 0           | 6.03              |
| 16 | 0         | 1             | 1           | 3.35              |
| 17 | -1        | 0             | 1           | 4.00              |

### Supplementary Table S4

**Table S4.** The analysis of variance (ANOVA) for response surface polynomial model.

| Source         | Sum of squares | df | Mean square | F value | p-value    |
|----------------|----------------|----|-------------|---------|------------|
| Model          | 45.30          | 9  | 5.03        | 29.54   | <0.0001*** |
| A-PEG          | 6.32           | 1  | 6.32        | 37.09   | 0.0005***  |
| B-CD           | 2.96           | 1  | 2.96        | 17.40   | 0.0042***  |
| C-SA           | 7.37           | 1  | 7.37        | 43.27   | 0.0003***  |
| AB             | 0.23           | 1  | 0.23        | 1.32    | 0.2876     |
| AC             | 3.57           | 1  | 3.57        | 20.97   | 0.0025***  |
| BC             | 0.014          | 1  | 0.014       | 0.085   | 0.7797     |
| A <sup>2</sup> | 6.60           | 1  | 6.60        | 38.75   | 0.0004***  |
| B <sup>2</sup> | 9.38           | 1  | 9.38        | 55.03   | 0.0001***  |
| C <sup>2</sup> | 6.26           | 1  | 6.26        | 36.77   | 0.0005***  |
| Residual       | 1.19           | 7  | 0.17        |         |            |
| Lack of fit    | 0.16           | 3  | 0.055       | 0.21    | 0.8827     |
| Pure error     | 1.03           | 4  | 0.26        |         |            |
| Cor total      | 46.49          | 16 |             |         |            |

R<sup>2</sup>=0.9743 AdjR<sup>2</sup>=0.9414 C.V.=7.42% AQ=15.166

\*Significant at P < 0.05, \*\* Significant at P < 0.01, \*\*\* Significant at P < 0.001

## Supplementary Figure S1

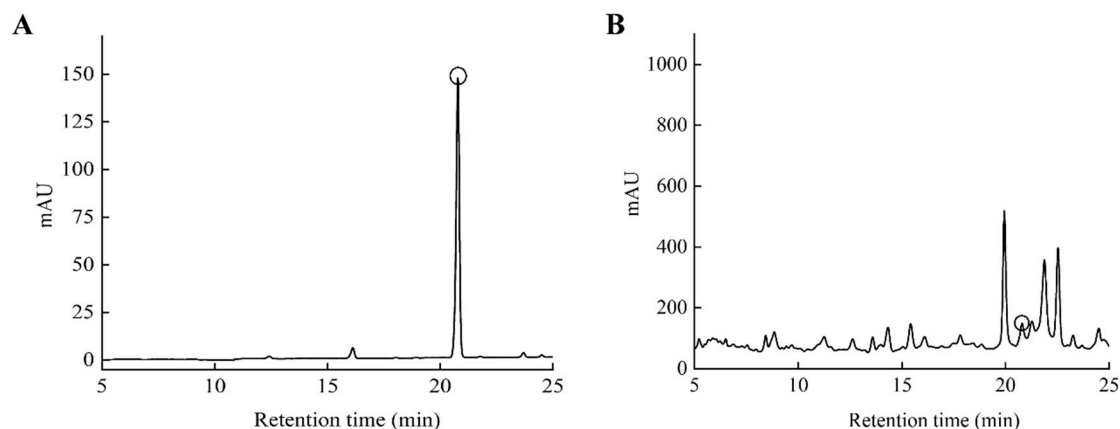

**Figure S1.** HPLC chromatograms of paclitaxel standard (A) and paclitaxel production by *T. cuspidata* suspension cells under elicitor treatments (B).

## Supplementary Table S5

**Table S5.** Primers for quantitative real-time PCR analysis of genes involved in paclitaxel synthesis and associated with elicitors treatment.

| Gene name              | Sequence                                                    | Product sizes (bp) |
|------------------------|-------------------------------------------------------------|--------------------|
| TBC41                  | F: CAAGAAGAAAGAGTCAGCAAATGG<br>R: GGAACGACATGACATTATGAATAGC | 91                 |
| DXS:                   | F: GGGTTTTTCGTGTTTATCGGC                                    | 156                |
| TRINITY_DN2395_c0_g1   | R: CGTAAGCTTGTCCAGCAGTCAT                                   |                    |
| DXR:                   | F: AACTAAGTGGCACTTTC                                        | 162                |
| TRINITY_DN2533_c0_g1   | R: AAGGAGCTCTGCGACGTA                                       |                    |
| IspF:                  | F: ATGGCGGGATGCTAAAACG                                      | 207                |
| TRINITY_DN497_c0_g1    | R: CTCAATGTGGAGCAAACAAAGA                                   |                    |
| IspG:                  | F: TCTCAACTGGTGCCACGA                                       | 212                |
| TRINITY_DN2343_c0_g1   | R: GGGGAAGTTCAGGGCGTTT                                      |                    |
| IspH:                  | F: GGCATAGTAGATGGGGT                                        | 193                |
| TRINITY_DN1245_c0_g1   | R: TGATGTGTGCGTGTGAGA                                       |                    |
| GGPPS:                 | F: TATCCTTTCCTTCGCCTTC                                      | 147                |
| TRINITY_DN33697_c0_g4  | R: AGAGAATGGCTTACACGGCA                                     |                    |
| TASY:                  | F: AGCCGATGATGTCCCGAT                                       | 143                |
| TRINITY_DN9815_c0_g1   | R: AGTCCTTAATCTCCTCGTT                                      |                    |
| DBAT:                  | F: GATTCCATCGGGGTATTCTTG                                    | 143                |
| TRINITY_DN1144_c1_g3   | R: GGCGATTGGGATTGATGAAG                                     |                    |
| BAPT:                  | F: ATACTCCTCGCCTTGTTTCACC                                   | 274                |
| TRINITY_DN1024_c0_g1   | R: GGCTCAGAAGGAAAGAAAATGG                                   |                    |
| DBTNBT:                | F: GAAATGTTGTCAGGGGCA                                       | 185                |
| TRINITY_DN109516_c0_g1 | R: AGCGGAATCAGGATGGAG                                       |                    |

**Supplementary Table S6****Table S6.** Statistics of RNA-Seq reads.

| Sample name | Read Sum | Base Sum   | GC (%) | N (%) | Q20 (%) | Cycle Q20 (%) | Q30 (%) |
|-------------|----------|------------|--------|-------|---------|---------------|---------|
| C1          | 23523922 | 7058076600 | 45.21  | 0.00  | 97.95   | 100.00        | 93.89   |
| C2          | 25446602 | 7633980600 | 44.65  | 0.00  | 98.07   | 100.00        | 94.14   |
| C3          | 24828539 | 7448561700 | 45.25  | 0.00  | 97.86   | 100.00        | 93.73   |
| T1          | 23133225 | 6939967500 | 44.74  | 0.00  | 98.13   | 100.00        | 94.28   |
| T2          | 27767789 | 8330336700 | 44.37  | 0.00  | 97.73   | 100.00        | 93.36   |
| T3          | 24226452 | 7267935600 | 44.59  | 0.00  | 97.87   | 100.00        | 93.72   |
